# Supplementary material
Source: Springer Nature journal article supplement (https://www.springermedizin.de/resource/supplementary/12885_2011_3248_MOESM1_ESM.pdf/9462866)

A.

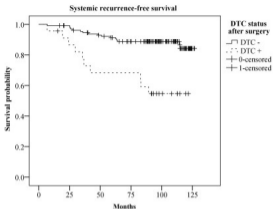

|                 |     |     |     |     |     |     |
|-----------------|-----|-----|-----|-----|-----|-----|
| No at risk DTC- | 131 | 128 | 121 | 117 | 117 | 115 |
| No at risk DTC+ | 23  | 20  | 16  | 16  | 13  | 13  |

B.

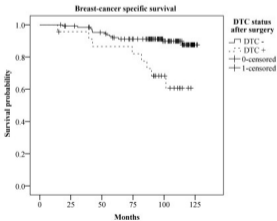

|                 |     |     |     |     |     |     |
|-----------------|-----|-----|-----|-----|-----|-----|
| No at risk DTC- | 131 | 130 | 125 | 120 | 119 | 118 |
| No at risk DTC+ | 23  | 22  | 20  | 19  | 16  | 15  |

Supplement: MOESM1 [file 9462866]
